# Supplementary material for: In vivo structure profiling reveals human cytosolic and mitochondrial tRNA structurome and interactome in response to stress
Source: Springer Nature journal article supplement (doi:10.1038/s41467-025-59435-5), 2025-05-30
Supplement: MOESM1 [file 41467_2025_59435_MOESM1_ESM.pdf › 41467_2025_59435_MOESM1_ESM.pdf]

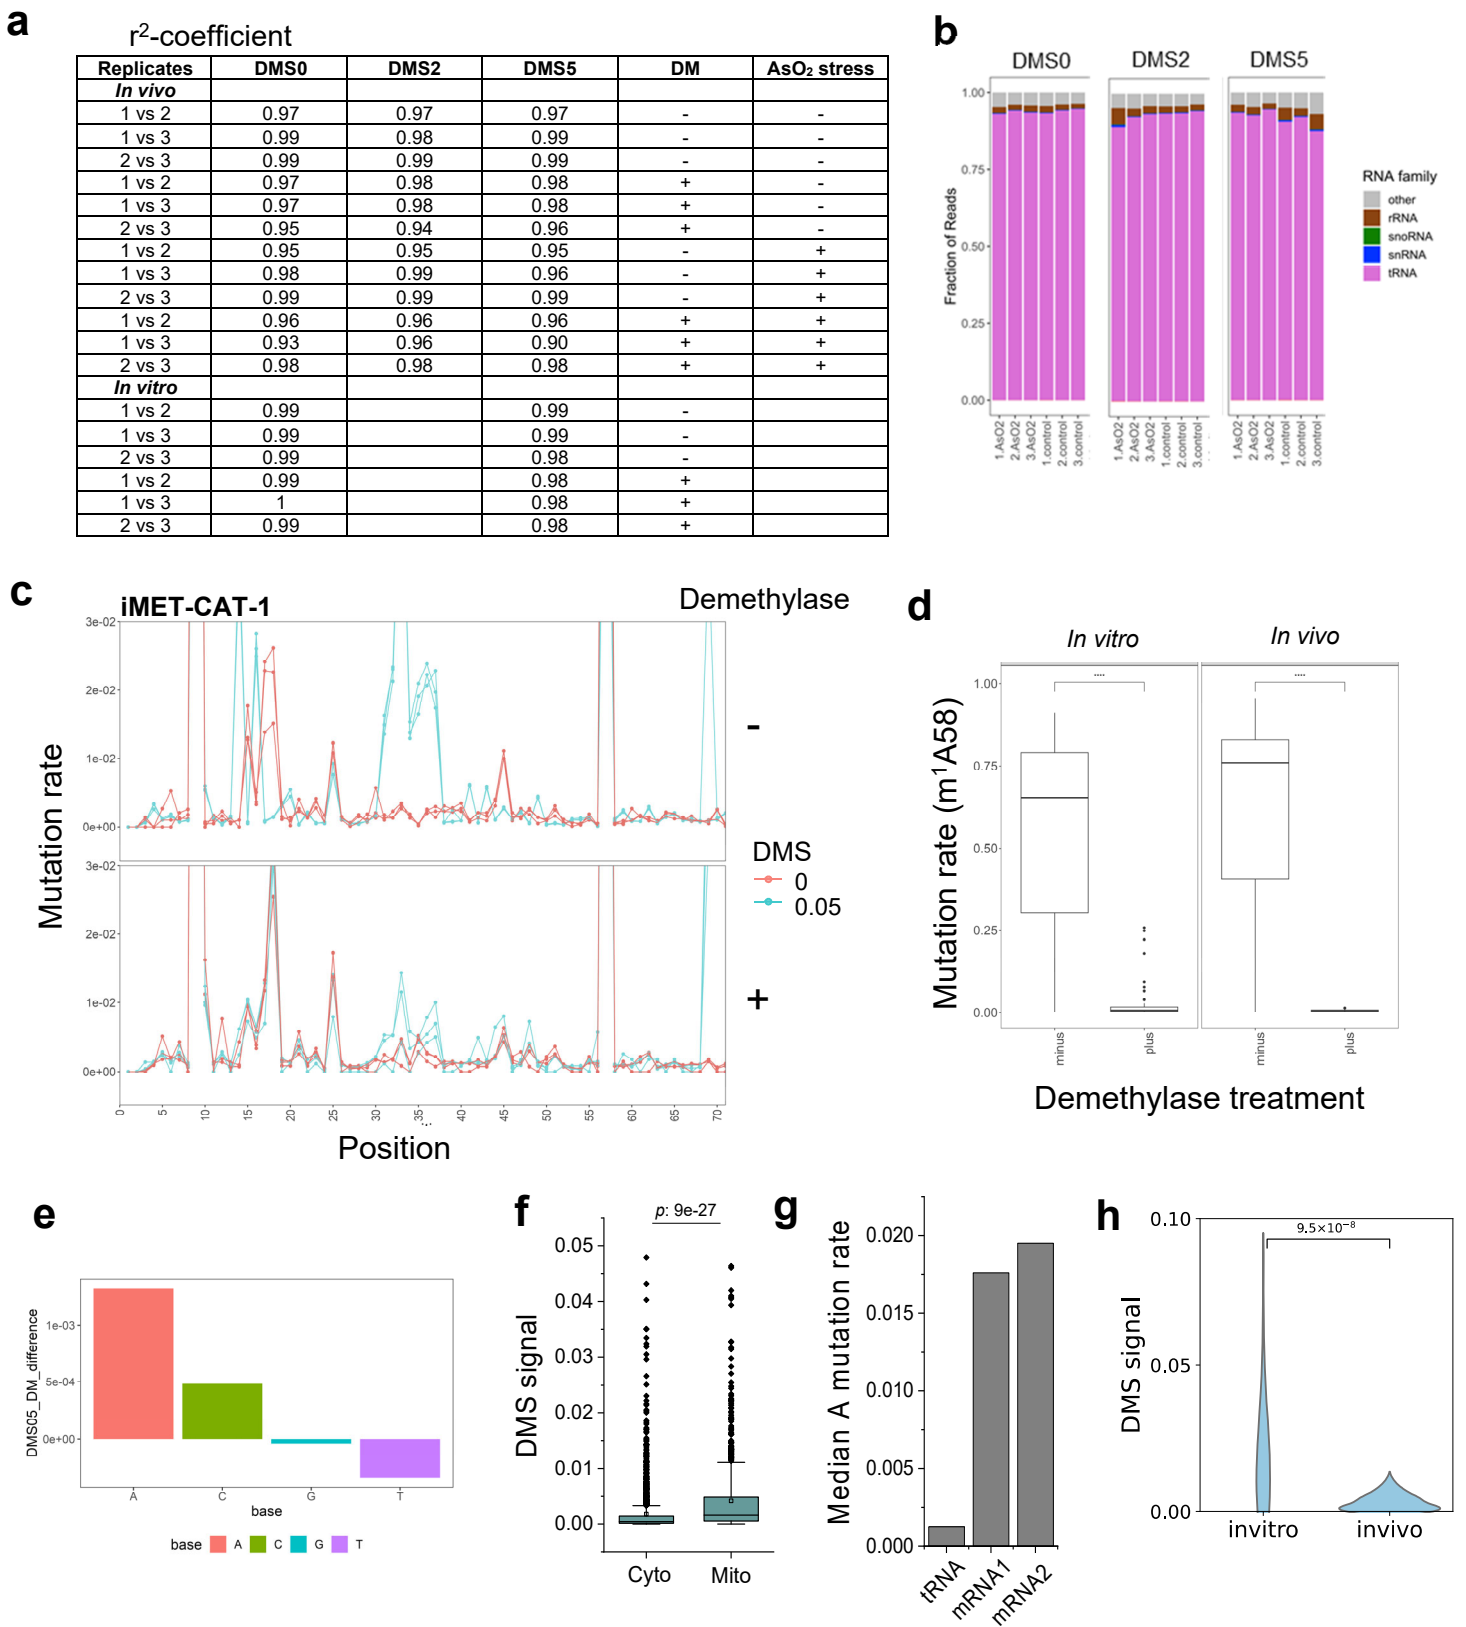

**Figure S1. Additional results for Fig. 1.**

- (a) Statistics of sequencing replicates.
- (b) Mapping fraction of tRNA and other RNA. DMS0: no DMS; DMS2: 2%DMS; DMS5: 5%DMS. SnoRNA read fractions are <0.5%.
- (c) Mutation rate of each nucleotide on tRNA<sup>Met</sup> with and without DMS or demethylase (DM) treatment.
- (d) Box-whisker plot showing the native m<sup>1</sup>A mutation rate distribution in 5% DMS treated in vitro and in vivo samples without (minus) and with (plus) demethylase (DM) treatment.
- (e) Nucleotide identity of DM<sub>diff</sub> samples with 5% DMS treatment.
- (f) DMS signals for cytosolic and mitochondrial tRNAs showing higher reactivity of mito-tRNAs.
- (g) Median mutation rate for A residues in tRNAs and mRNAs *in vivo*. The positional read filter to calculate the mutation rate is ≥100 for mRNA1 and ≥500 for mRNA2.
- (h) Gini-plot of DMS signal *in vitro* (left) and *in vivo* (right) samples excluding the native m<sup>1</sup>A/m<sup>3</sup>C/m<sup>1</sup>G modified positions.

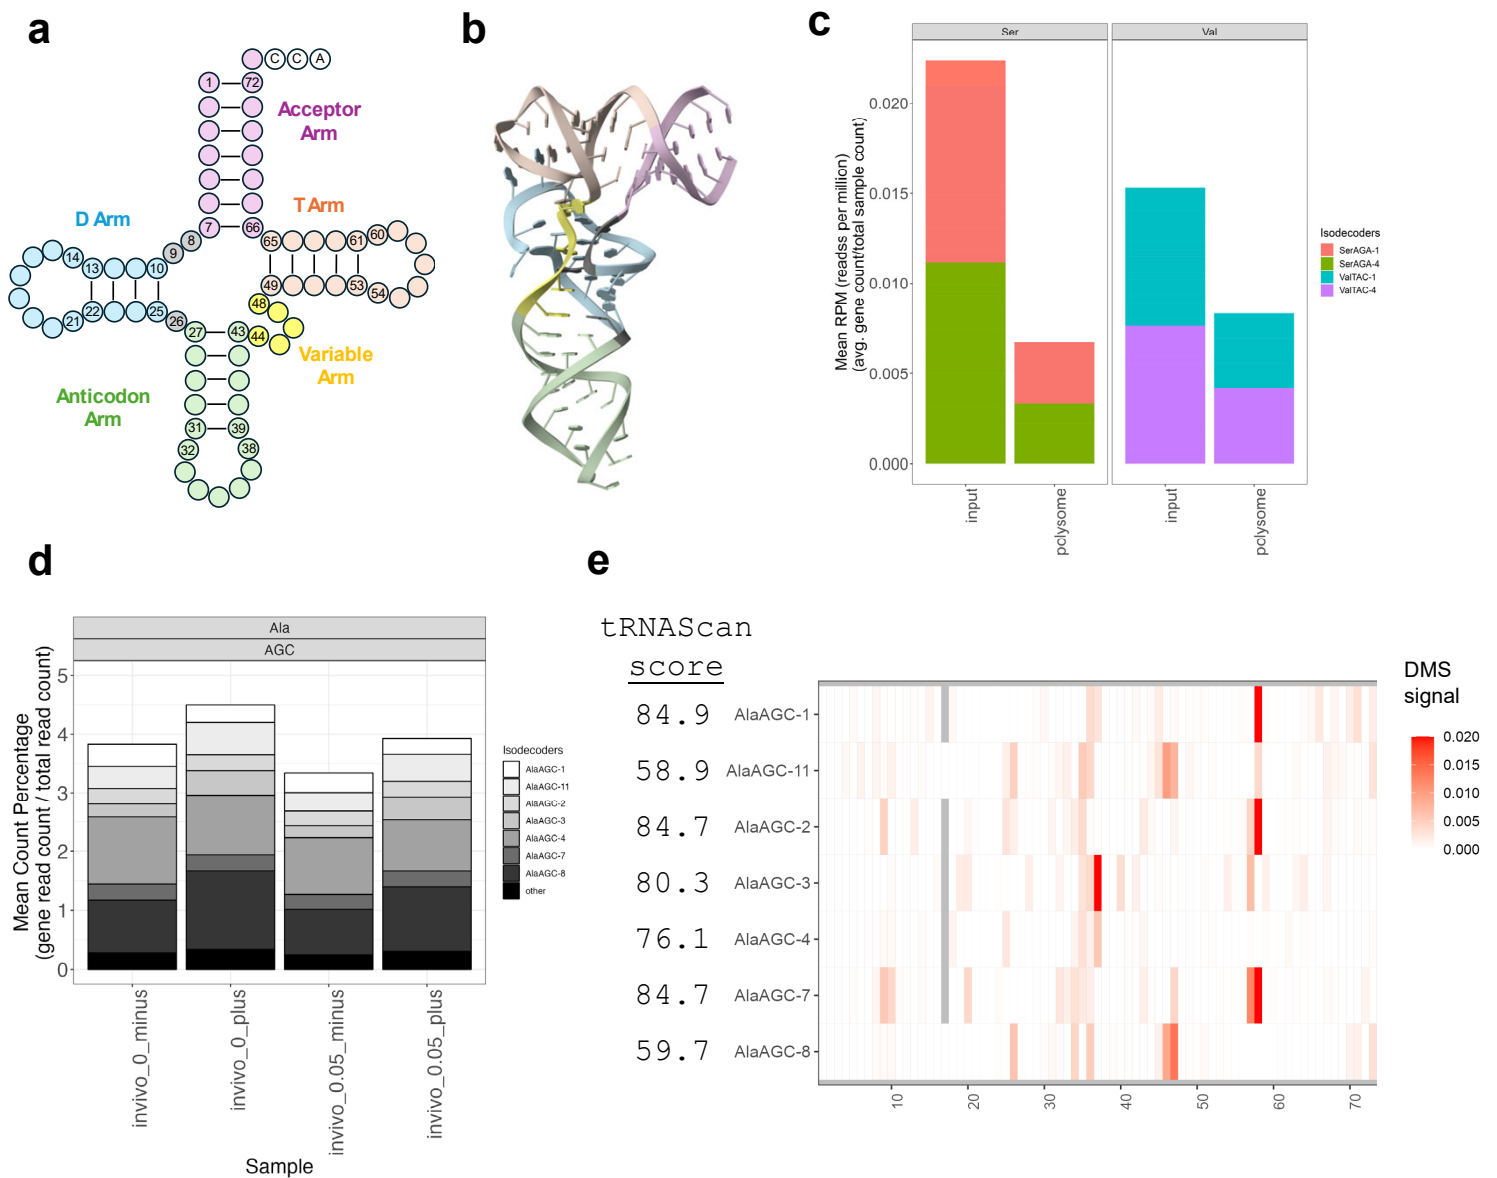

**Figure S2. tRNA secondary and tertiary structure and residue nomenclature, and additional results for Fig. 2.**

- (a) Cloverleaf secondary structure, also showing standard tRNA nomenclature and canonical positions used in this work.
- (b) Tertiary structure modified from a tRNA<sup>Val</sup> structure (PDB: 8CTI), different stem-loop regions are color coded like in (a).
- (c) Mean RPM values of SerAGA-1/-4 and ValUAC-1/-4 isodecoders from input (total RNA) and polysome-enriched samples, sequencing data from NCBI GSE198441.
- (d) Mean read count percentage of all tRNA<sup>Ala</sup>(AGC) isodecoders under different *in vivo* conditions, 0\_minus/0.05\_minus, no DMS (0) or 5% DMS (0.05), no demethylase (DM) treatment, 0\_plus/0.05\_plus, no DMS (0) or 5% DMS (0.05), +DM treatment.
- (e) Heatmap showing the *in vivo* positional DMS signals for the tRNA<sup>Ala</sup>(AGC) isodecoders expressed in our samples.

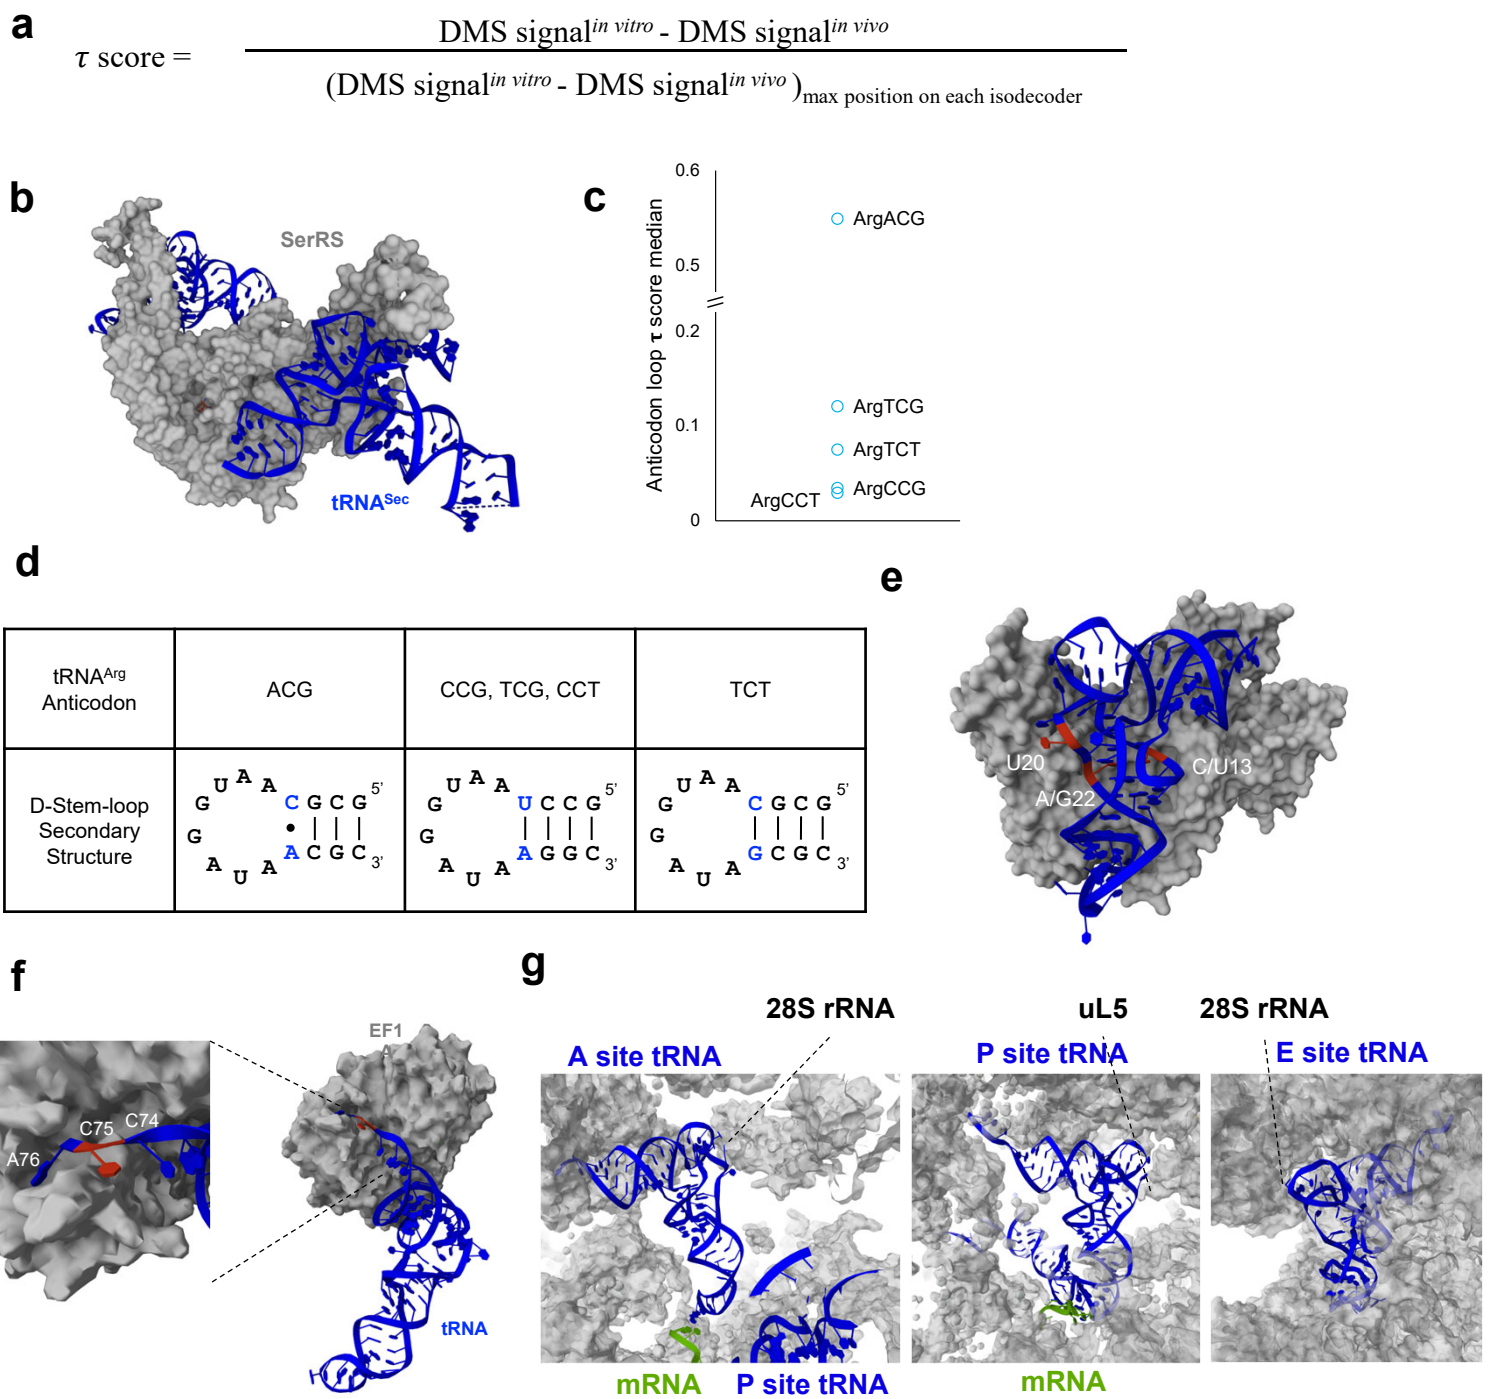

**Figure S3. Additional results for Fig. 3.**

- (a) Definition of  $\tau$  score.
- (b) Human SerRS-tRNA<sup>Sec</sup> structure showing the anticodon loop of the substrate tRNA is not bound by the SerRS (PDB: 4RQE).
- (c) Box-whisker plot showing anticodon loop  $\tau$  score medians of 5 tRNA<sup>Arg</sup> isoacceptors ( $n = 3$  biological replicates).
- (d) D-stem loop sequence and secondary structures of 5 tRNA<sup>Arg</sup> isoacceptors. Base pair differences are shown in blue.
- (e) Structure of yeast ArgRS interacting with tRNA<sup>Arg</sup> (PDB: 1F7V).
- (f) EF-1A-tRNA structure showing protection of C75 residue (PDB: 8G60).
- (g) Structures of A, P, and E site tRNAs in the human ribosome showing protection of the tRNA elbow region (PDB: 8G60 (A and P site), PDB: 6QZP (E site)).

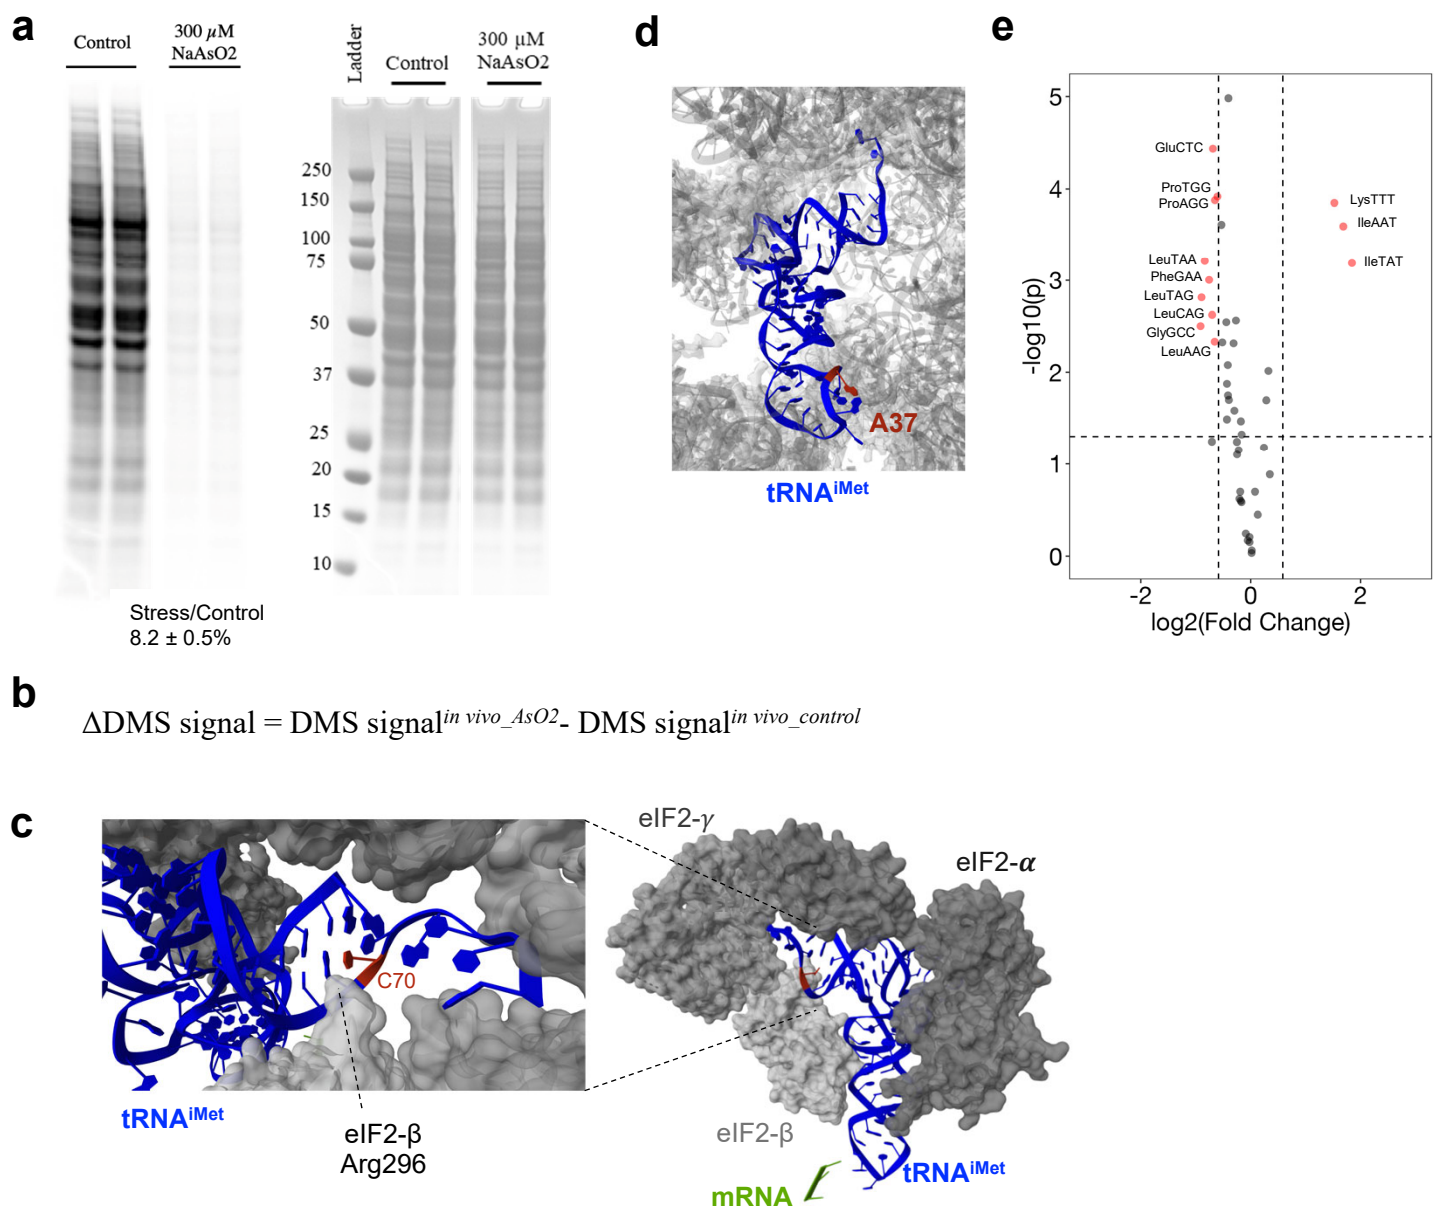

**Figure S4. Additional results for Fig. 4.**

- (a) <sup>35</sup>S-Met pulse-chase showing a strong reduction of translation upon arsenite treatment. Coomassie stained loading controls are on the right.
- (b) Formula of the  $\Delta$ DMS signal.
- (c) eIF2B-tRNA<sup>iMet</sup>-tRNA ternary complex structure showing eIF2- $\beta$  Arg296 residue in proximity to C70 (C71 in tRNA nomenclature) of tRNA<sup>iMet</sup> (PDB: 6YBV).
- (d) tRNA<sup>iMet</sup> at the A site of the ribosome with A37 highlighted in red (PDB: 4UG0).
- (e) Cytosolic tRNA changes on the polysome under stress (AsO<sub>2</sub> polysome/control polysome). Vertical lines indicate a 1.5-fold change; the horizontal line indicates  $p = 0.05$ . Data from reference 24 and NCBI GSE198441.



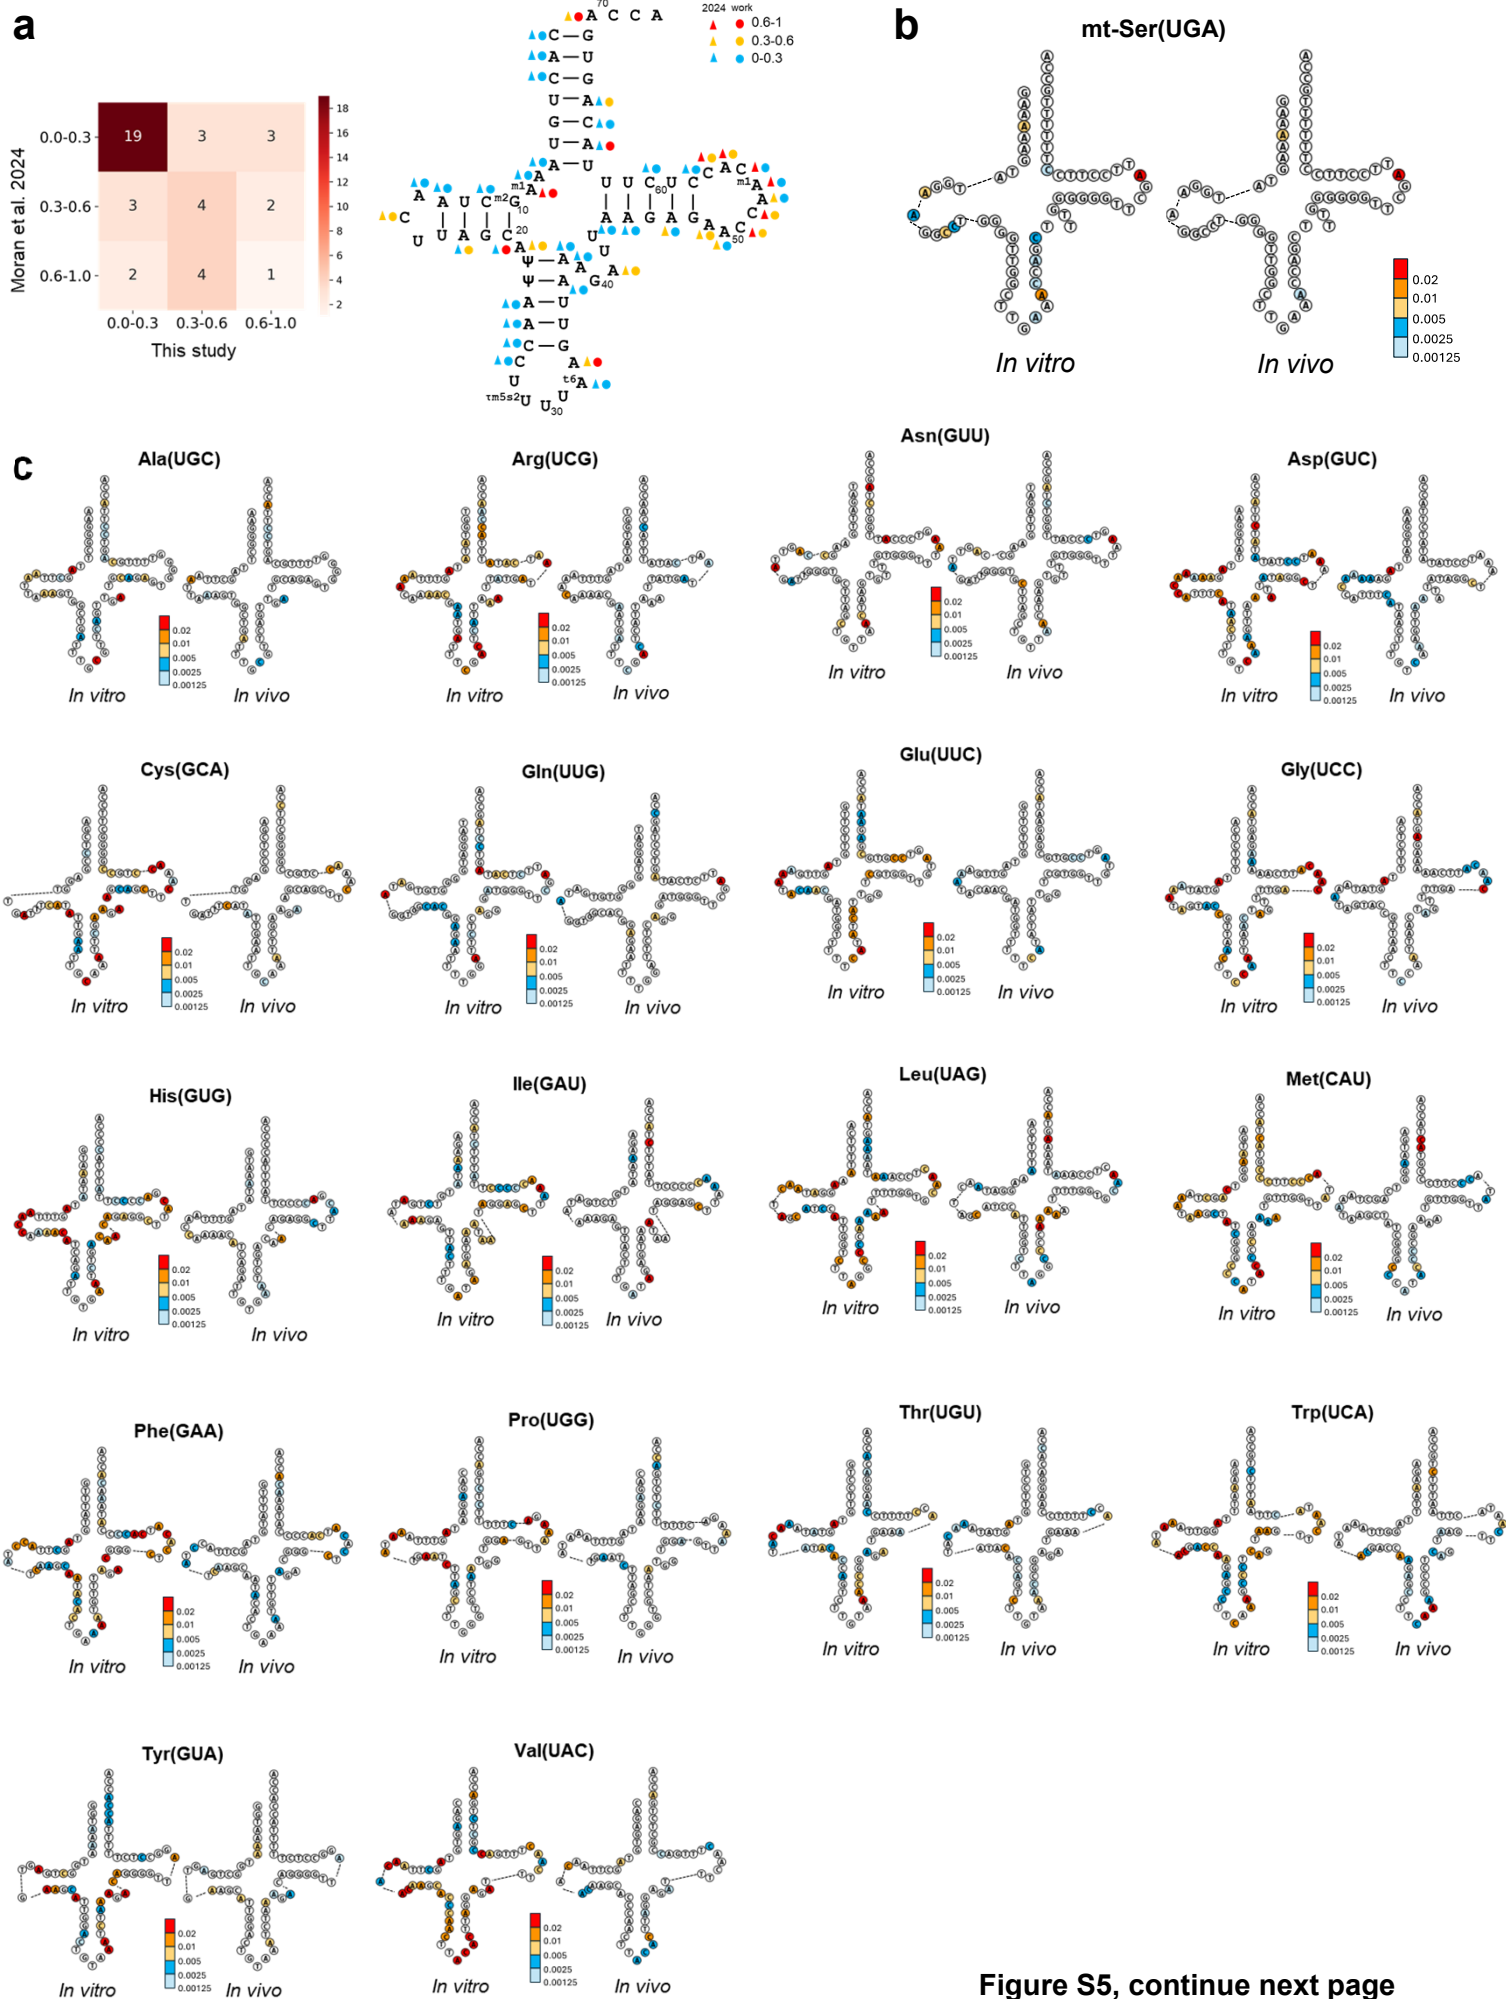

**d**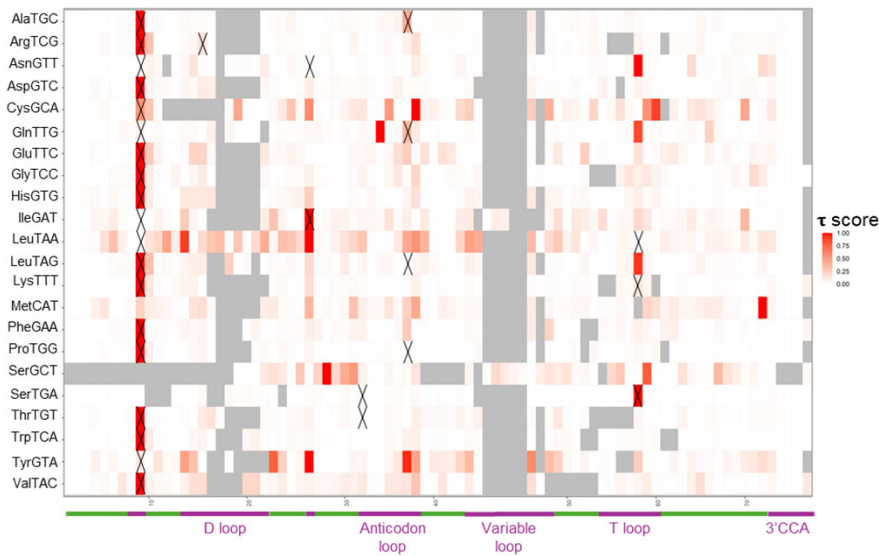**e**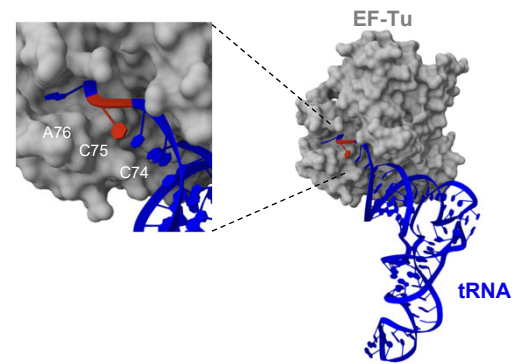

**Figure S5. Additional results for Fig. 5.**

- Comparison of positional DMS reactivity of mt-tRNA<sup>Lys</sup> between data obtained in this study and reference 23, presented as heatmap (left) and in secondary structure (right).
- Secondary structure of mt-tRNA<sup>Ser</sup>(UGA) overlaid with *in vitro* and *in vivo* DMS signals according to the colored scale bar. The dashed lines connects the residues in this schematic for mt-tRNAs. Mt-tRNA positions are according to reference 28.
- Secondary structures of 18 type II mt-tRNAs overlaid with *in vitro* and *in vivo* DMS signals according to the colored scale bar. The dashed lines connects the residues in this schematic for mt-tRNAs. Mt-tRNA positions are according to reference 28.
- Heatmap showing the positional  $\tau$  scores on each mt-tRNA. Native modifications (reference 30) that are incompletely removed by demethylases are marked with "X".
- EF-Tu-mt-tRNA structure showing C75 interaction (PDB: 1TTT).

**a**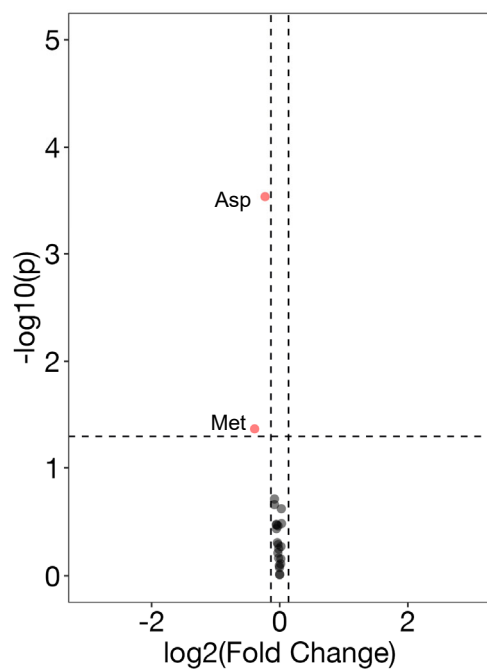

**Figure S6. Additional results for Fig. 6.**

(a) mt-tRNA charging fold changes in polysomes under arsenite treatment. The dotted vertical lines indicate a 1.1-fold change (FC), and the dotted horizontal line indicates  $p = 0.05$ . Data from reference 24 and NCBI GSE198441.

**Supplemental Table 1: Sequencing library sample description and alignment rates**

| Sample              | Demethylase (DM) | DMS (%) | bowtie_total_reads | bowtie_alignment_rate | mimseq_total_reads | mimseq_alignment_rate |
|---------------------|------------------|---------|--------------------|-----------------------|--------------------|-----------------------|
| invivo rep 1        | minus            | 0       | 15715439           | 50.75%                | 12344688           | 65%                   |
| invivo rep 1        | minus            | 2       | 9722879            | 51.93%                | 7904772            | 55%                   |
| invivo rep 1        | minus            | 5       | 16120250           | 34.92%                | 9609525            | 59%                   |
| invivo rep 2        | minus            | 0       | 19892094           | 53.73%                | 16818898           | 68%                   |
| invivo rep 2        | minus            | 2       | 11151715           | 51.78%                | 9427936            | 67%                   |
| invivo rep 2        | minus            | 5       | 16013586           | 35.88%                | 10369044           | 61%                   |
| invivo rep 3        | minus            | 0       | 22142765           | 68.55%                | 19667269           | 71%                   |
| invivo rep 3        | minus            | 2       | 11800992           | 67.33%                | 10487449           | 69%                   |
| invivo rep 3        | minus            | 5       | 12734766           | 40.63%                | 8290601            | 56%                   |
| invivo rep 1        | plus             | 0       | 12147387           | 62.14%                | 9287760            | 67%                   |
| invivo rep 1        | plus             | 2       | 7351527            | 64.16%                | 5792604            | 67%                   |
| invivo rep 1        | plus             | 5       | 12663814           | 39.97%                | 6777626            | 61%                   |
| invivo rep 2        | plus             | 0       | 18785916           | 63.98%                | 14830160           | 68%                   |
| invivo rep 2        | plus             | 2       | 10125640           | 62.21%                | 7958329            | 66%                   |
| invivo rep 2        | plus             | 5       | 16951181           | 35.33%                | 8441927            | 60%                   |
| invivo rep 3        | plus             | 0       | 27552423           | 79.88%                | 24156280           | 74%                   |
| invivo rep 3        | plus             | 2       | 14034843           | 77.87%                | 12190014           | 72%                   |
| invivo rep 3        | plus             | 5       | 15057889           | 44.90%                | 9036441            | 60%                   |
| in vitro ctrl rep 1 | minus            | 5       | 51418879           | 55.08%                | 45434448           | 39%                   |
| in vitro ctrl rep 2 | minus            | 5       | 37675709           | 54.38%                | 33862685           | 37%                   |
| in vitro ctrl rep 3 | minus            | 5       | 46871163           | 47.08%                | 38442226           | 35%                   |
| in vitro ctrl rep 1 | plus             | 5       | 55892951           | 70.55%                | 48040194           | 49%                   |
| in vitro ctrl rep 2 | plus             | 5       | 41578868           | 70.90%                | 36426561           | 42%                   |
| in vitro ctrl rep 3 | plus             | 5       | 58474628           | 58.40%                | 44447629           | 39%                   |
| AsO2 stress rep 1   | minus            | 0       | 16493481           | 51.27%                | 13478845           | 64%                   |
| AsO2 stress rep 1   | minus            | 2       | 8395121            | 44.94%                | 6076516            | 62%                   |
| AsO2 stress rep 1   | minus            | 5       | 8583125            | 54.49%                | 7141546            | 66%                   |
| AsO2 stress rep 2   | minus            | 0       | 14869160           | 52.40%                | 12543129           | 68%                   |
| AsO2 stress rep 2   | minus            | 2       | 7896793            | 46.50%                | 6200229            | 65%                   |
| AsO2 stress rep 2   | minus            | 5       | 6424637            | 49.07%                | 5344485            | 65%                   |
| AsO2 stress rep 3   | minus            | 0       | 14361049           | 64.91%                | 12524400           | 68%                   |
| AsO2 stress rep 3   | minus            | 2       | 11080964           | 63.44%                | 9466772            | 68%                   |
| AsO2 stress rep 3   | minus            | 5       | 7988812            | 66.82%                | 7127207            | 68%                   |
| AsO2 stress rep 1   | plus             | 0       | 12369389           | 64.52%                | 9958992            | 66%                   |
| AsO2 stress rep 1   | plus             | 2       | 6511664            | 53.60%                | 4388751            | 64%                   |
| AsO2 stress rep 1   | plus             | 5       | 6609581            | 67.04%                | 5312129            | 68%                   |
| AsO2 stress rep 2   | plus             | 0       | 13505123           | 63.59%                | 10629544           | 68%                   |
| AsO2 stress rep 2   | plus             | 2       | 7610307            | 50.89%                | 5103341            | 64%                   |
| AsO2 stress rep 2   | plus             | 5       | 6136073            | 57.92%                | 4624615            | 64%                   |
| AsO2 stress rep 3   | plus             | 0       | 17275086           | 76.76%                | 14935113           | 71%                   |
| AsO2 stress rep 3   | plus             | 2       | 12965077           | 72.87%                | 10668580           | 71%                   |
| AsO2 stress rep 3   | plus             | 5       | 9428126            | 77.33%                | 8150711            | 72%                   |
